# Supplementary material
Source: publisher figshare collection journal article supplement (https://acs.figshare.com/ndownloader/files/3986698)
Supplement: Supplementary file 1 [file 3986698]

data_global
 

#==============================================================================

_publ_contact_letter
;
 Submission dated :2013-06-26
 
 
This CIF  is submitted as a personal communication.
 

PLAT029_ALERT_3_A _diffrn_measured_fraction_theta_full Low .......   0.884 
Response: we used the synchrotron radiation for the data collection 
because of the small crystal dimensions and the high content of disordered
 solvent molecules. For this reason also the cryo-cooling technique was 
required in order to gain good diffraction intensity. 
 

PLAT601_ALERT_2_A Structure Contains Solvent Accessible VOIDS of    439 Ang3 
Response: The presence of residual density in the void was verified 
with PLATON/SQUEEZE. A residual electron density of 308 eletron in cell 
could be ascribed to about 10 disordered water molecules.  

Best regards,
G. Brancatelli 

;
 
#------------------  SECTION 2. COMPOUND(S) DETAILS -------------------------#
 
data_CF3Cbl
 
#----------------------------------------------------------------------------#
#                   CHEMICAL INFORMATION                                     #
#----------------------------------------------------------------------------#
_chemical_name_systematic
;
 trifluoromethyl-cobalamine
;
_chemical_formula_moiety  
  'C62.93 H88 N13 O14 P Co F2.79 I0.07, 1.5(C3 H6 O), 8.35 (O)'  
 _chemical_formula_sum               'C67.46 H97 Co F2.79 I0.07 N13 O23.85 P'
_chemical_formula_weight                1623.49
_chemical_absolute_configuration        rmad
 
#----------------------------------------------------------------------------#
#                   UNIT CELL INFORMATION                                    #
#----------------------------------------------------------------------------#
 
loop_
    _symmetry_equiv_pos_as_xyz
'x, y, z'
'-x+1/2, -y, z+1/2'
'x+1/2, -y+1/2, -z'
'-x, y+1/2, -z+1/2'
_symmetry_cell_setting            orthorhombic
_symmetry_space_group_name_H-M    'P 21 21 21'
_symmetry_space_group_name_Hall   'P 2ac 2ab'
_cell_length_a                          15.5600(3)
_cell_length_b                          22.5900(8)
_cell_length_c                          24.9700(7)
_cell_angle_alpha                       90
_cell_angle_beta                        90
_cell_angle_gamma                       90
_cell_volume                            8777.0(4)
_cell_formula_units_Z                   4
_cell_measurement_temperature           100(2)
 
#----------------------------------------------------------------------------#
#                   CRYSTAL INFORMATION                                      #
#----------------------------------------------------------------------------#
 
_exptl_crystal_size_max                 0.31
_exptl_crystal_size_mid                 0.18
_exptl_crystal_size_min                 0.13
_exptl_crystal_density_diffrn           1.268
_exptl_crystal_density_method           'not measured'
_exptl_crystal_F_000                    3501
_exptl_special_details
;
 ?
;
 
#----------------------------------------------------------------------------#
#                   ABSORPTION CORRECTION                                    #
#----------------------------------------------------------------------------#
 
_exptl_absorpt_coefficient_mu           0.328
_exptl_absorpt_correction_type          refdelf
_exptl_absorpt_process_details
;
        Parkin S,Moezzi B & Hope H, (1995) J. Appl. Cryst. 28, 53-56
        Cubic fit to sin(theta)/lambda - 24 parameters
;
_exptl_absorpt_correction_T_min         0.5533
_exptl_absorpt_correction_T_max         1.4828
 
#----------------------------------------------------------------------------#
#                   DATA COLLECTION                                          #
#----------------------------------------------------------------------------#
 
_diffrn_ambient_temperature             100(2)
_diffrn_radiation_wavelength            0.7
_diffrn_radiation_monochromator         graphite
_diffrn_reflns_av_unetI/netI            0.0481
_diffrn_reflns_number                   14414
_diffrn_reflns_limit_h_min              -17
_diffrn_reflns_limit_h_max              17
_diffrn_reflns_limit_k_min              0
_diffrn_reflns_limit_k_max              27
_diffrn_reflns_limit_l_min              0
_diffrn_reflns_limit_l_max              30
_diffrn_reflns_theta_min                10.09
_diffrn_reflns_theta_max                25
_diffrn_reflns_theta_full               25
_diffrn_measured_fraction_theta_full
                                        0.884
_diffrn_measured_fraction_theta_max
                                        0.884
_reflns_number_total                    14414
_reflns_number_gt                       13145
_reflns_threshold_expression            >2\s(I)
 
#----------------------------------------------------------------------------#
#                   COMPUTER PROGRAMS USED                                   #
#----------------------------------------------------------------------------#
 
_computing_structure_refinement         'SHELXL-97 (Sheldrick, 2008)'
 
#----------------------------------------------------------------------------#
#                   STRUCTURE SOLUTION
#----------------------------------------------------------------------------#
 
_atom_sites_solution_primary            direct
_atom_sites_solution_secondary          difmap
_atom_sites_solution_hydrogens          geom
 
#----------------------------------------------------------------------------#
#                   REFINEMENT INFORMATION                                   #
#----------------------------------------------------------------------------#
 
_refine_special_details
;
 Refinement of F^2^ against ALL reflections.  The weighted R-factor wR and
 goodness of fit S are based on F^2^, conventional R-factors R are based
 on F, with F set to zero for negative F^2^. The threshold expression of
 F^2^ > 2\s(F^2^) is used only for calculating R-factors(gt) etc. and is
 not relevant to the choice of reflections for refinement.  R-factors based
 on F^2^ are statistically about twice as large as those based on F, and R-
 factors based on ALL data will be even larger.
;
_refine_ls_structure_factor_coef        Fsqd
_refine_ls_matrix_type                  full
_refine_ls_weighting_scheme             calc
_refine_ls_weighting_details
         'calc w=1/[\s^2^(Fo^2^)+(0.1041P)^2^+6.8409P] where P=(Fo^2^+2Fc^2^)/3'
_refine_ls_hydrogen_treatment           constr
_refine_ls_extinction_method            none
_refine_ls_number_reflns                14414
_refine_ls_number_parameters            1034
_refine_ls_number_restraints            3
_refine_ls_R_factor_all                 0.0761
_refine_ls_R_factor_gt                  0.0702
_refine_ls_wR_factor_ref                0.1876
_refine_ls_wR_factor_gt                 0.1823
_refine_ls_goodness_of_fit_ref          1.033
_refine_ls_restrained_S_all             1.033
_refine_ls_shift/su_max                 0.091
_refine_ls_shift/su_mean                0.001
_refine_ls_abs_structure_details
                                    'Flack H D (1983), Acta Cryst. A39, 876-881'
_refine_ls_abs_structure_Flack          0.035(17)
_refine_diff_density_max                0.616
_refine_diff_density_min                -0.357
_refine_diff_density_rms                0.051
 
#----------------------------------------------------------------------------#
#                   ATOMIC TYPES, COORDINATES AND THERMAL PARAMETERS         #
#----------------------------------------------------------------------------#
 
loop_
    _atom_type_symbol
    _atom_type_description
    _atom_type_scat_dispersion_real
    _atom_type_scat_dispersion_imag
    _atom_type_scat_source
C C 0.003 0.002 'International Tables Vol C Tables 4.2.6.8 and 6.1.1.4'
H H 0 0 'International Tables Vol C Tables 4.2.6.8 and 6.1.1.4'
N N 0.006 0.003 'International Tables Vol C Tables 4.2.6.8 and 6.1.1.4'
O O 0.01 0.006 'International Tables Vol C Tables 4.2.6.8 and 6.1.1.4'
F F 0.017 0.01 'International Tables Vol C Tables 4.2.6.8 and 6.1.1.4'
P P 0.1 0.092 'International Tables Vol C Tables 4.2.6.8 and 6.1.1.4'
Co Co 0.351 0.949 'International Tables Vol C Tables 4.2.6.8 and 6.1.1.4'
I I -0.4742 1.8119 'International Tables Vol C Tables 4.2.6.8 and 6.1.1.4'
 
loop_
    _atom_site_label
    _atom_site_type_symbol
    _atom_site_fract_x
    _atom_site_fract_y
    _atom_site_fract_z
    _atom_site_U_iso_or_equiv
    _atom_site_adp_type
    _atom_site_occupancy
    _atom_site_symmetry_multiplicity
    _atom_site_calc_flag
    _atom_site_refinement_flags
    _atom_site_disorder_assembly
    _atom_site_disorder_group
C37 C 0.1762(4) 0.0656(3) 0.2676(4) 0.0840(19) Uani 1 1 d . E .
H37A H 0.1988 0.0763 0.3034 0.101 Uiso 1 1 calc R . .
H37B H 0.181 0.022 0.2643 0.101 Uiso 1 1 calc R . .
C29 C -0.3698(6) -0.0601(3) 0.1409(2) 0.085(2) Uani 1 1 d . . .
H29A H -0.4233 -0.039 0.1309 0.103 Uiso 1 1 calc R . .
H29B H -0.3205 -0.0373 0.1266 0.103 Uiso 1 1 calc R . .
C30 C -0.3705(6) -0.1218(4) 0.1163(2) 0.085(2) Uani 1 1 d . . .
N7 N -0.4416(5) -0.1426(2) 0.0995(2) 0.090(2) Uani 1 1 d . . .
H7A H -0.4439 -0.1786 0.0862 0.108 Uiso 1 1 calc R . .
H7B H -0.4886 -0.121 0.1013 0.108 Uiso 1 1 calc R . .
O6 O -0.3042(5) -0.1515(5) 0.1140(5) 0.191(6) Uani 1 1 d . . .
C22A C -0.4503(5) 0.2173(5) 0.2096(4) 0.051(2) Uani 0.6 1 d P A 1
H22A H -0.4175 0.2545 0.2047 0.061 Uiso 0.6 1 calc PR A 1
H22B H -0.4232 0.1865 0.187 0.061 Uiso 0.6 1 calc PR A 1
C23A C -0.5419(6) 0.2269(6) 0.1909(4) 0.070(3) Uani 0.6 1 d PD A 1
O5A O -0.5930(5) 0.1843(5) 0.1842(4) 0.109(3) Uani 0.6 1 d PD A 1
N4A N -0.5629(8) 0.2777(5) 0.1709(5) 0.078(5) Uani 0.6 1 d PD A 1
H4A1 H -0.6115 0.2817 0.1532 0.093 Uiso 0.6 1 calc PR A 1
H4A2 H -0.5285 0.3083 0.1749 0.093 Uiso 0.6 1 calc PR A 1
C22B C -0.4686(11) 0.2288(7) 0.2266(7) 0.053(4) Uiso 0.4 1 d P A 2
H22C H -0.4434 0.2074 0.1957 0.064 Uiso 0.4 1 calc PR A 2
H22D H -0.4387 0.2674 0.2287 0.064 Uiso 0.4 1 calc PR A 2
C23B C -0.5636(13) 0.2425(7) 0.2114(8) 0.064(4) Uiso 0.4 1 d P A 2
O4B O -0.6162(8) 0.2311(5) 0.2360(5) 0.080(3) Uiso 0.4 1 d PD A 2
N5B N -0.569(3) 0.282(2) 0.1771(18) 0.157(19) Uiso 0.4 1 d PD A 2
H5C H -0.6172 0.3015 0.1727 0.188 Uiso 0.4 1 calc PR A 2
H5D H -0.5238 0.2907 0.1572 0.188 Uiso 0.4 1 calc PR A 2
Co1 Co -0.23028(4) 0.09532(2) 0.23810(2) 0.04004(16) Uani 1 1 d . . .
P1 P 0.04168(10) 0.26197(5) 0.52100(6) 0.0595(3) Uani 1 1 d . . .
O16 O -0.1159(2) 0.17951(12) 0.41232(12) 0.0461(7) Uani 1 1 d . E .
H16 H -0.1678 0.1697 0.4106 0.069 Uiso 1 1 calc R . .
O10 O -0.2469(4) 0.3722(3) 0.34474(17) 0.0924(15) Uani 1 1 d . . .
O11 O 0.0196(2) 0.23064(13) 0.46585(14) 0.0534(8) Uani 1 1 d . . .
O12 O 0.0544(2) 0.32809(13) 0.50161(14) 0.0533(8) Uani 1 1 d . . .
N13 N -0.1998(2) 0.07245(13) 0.31733(14) 0.0375(7) Uani 1 1 d . E .
C4 C -0.4145(3) 0.0960(2) 0.25295(16) 0.0493(10) Uani 1 1 d . . .
C14 C -0.0470(3) 0.1186(2) 0.21844(18) 0.0476(10) Uani 1 1 d . . .
N1 N -0.3396(2) 0.12048(15) 0.25891(14) 0.0419(7) Uani 1 1 d . A .
N11 N -0.2892(3) 0.4327(2) 0.2786(2) 0.0717(13) Uani 1 1 d . . .
H11A H -0.2807 0.4645 0.2983 0.086 Uiso 1 1 calc R . .
H11B H -0.3082 0.4362 0.2456 0.086 Uiso 1 1 calc R . .
N10 N 0.0115(3) 0.35181(17) 0.39479(17) 0.0547(10) Uani 1 1 d . . .
H10X H -0.0401 0.3567 0.4084 0.066 Uiso 1 1 calc R . .
N2 N -0.2740(3) 0.01646(16) 0.22855(13) 0.0481(8) Uani 1 1 d . E .
N4 N -0.2023(2) 0.17650(14) 0.24671(13) 0.0409(7) Uani 1 1 d . E .
C31 C -0.2740(4) -0.1173(2) 0.2751(2) 0.0588(12) Uani 1 1 d . . .
H31A H -0.3009 -0.0904 0.3016 0.071 Uiso 1 1 calc R . .
H31B H -0.3098 -0.1535 0.2731 0.071 Uiso 1 1 calc R . .
C27 C -0.5193(4) 0.0206(3) 0.2180(3) 0.0719(15) Uani 1 1 d . . .
H27A H -0.52 -0.0071 0.1878 0.108 Uiso 1 1 calc R E .
H27B H -0.5516 0.0563 0.2084 0.108 Uiso 1 1 calc R . .
H27C H -0.5457 0.0019 0.2493 0.108 Uiso 1 1 calc R . .
C42 C -0.0611(3) 0.2887(2) 0.33091(19) 0.0520(11) Uani 1 1 d . E .
H42A H -0.1091 0.2968 0.3559 0.062 Uiso 1 1 calc R . .
H42B H -0.0523 0.2453 0.3296 0.062 Uiso 1 1 calc R . .
N3 N -0.1146(3) 0.07827(17) 0.22056(15) 0.0478(8) Uani 1 1 d . E .
C59 C -0.1881(3) 0.03244(16) 0.40027(16) 0.0392(8) Uani 1 1 d . E .
C55 C -0.3213(3) 0.00974(18) 0.35570(17) 0.0412(8) Uani 1 1 d . E .
H55 H -0.3583 0.013 0.3256 0.049 Uiso 1 1 calc R . .
C28 C -0.4362(4) -0.1023(3) 0.2257(2) 0.0691(15) Uani 1 1 d . . .
H28A H -0.4436 -0.0938 0.2639 0.104 Uiso 1 1 calc R . .
H28B H -0.4221 -0.1442 0.2209 0.104 Uiso 1 1 calc R . .
H28C H -0.4896 -0.0931 0.2065 0.104 Uiso 1 1 calc R . .
O13 O 0.1164(3) 0.23620(18) 0.5454(2) 0.0837(14) Uani 1 1 d . . .
C9 C -0.2234(4) -0.0300(2) 0.21999(19) 0.0556(11) Uani 1 1 d . . .
O14 O -0.0341(6) 0.2620(2) 0.5572(3) 0.132(3) Uani 1 1 d . . .
C19 C -0.2778(3) 0.21617(18) 0.25046(16) 0.0455(9) Uani 1 1 d . . .
H19 H -0.3004 0.2232 0.2135 0.055 Uiso 1 1 calc R E .
C47 C 0.1234(3) 0.34407(19) 0.46529(19) 0.0498(10) Uani 1 1 d . . .
H47 H 0.1508 0.3077 0.4501 0.06 Uiso 1 1 calc R . .
C21 C -0.4821(4) 0.2398(3) 0.3127(4) 0.0813(19) Uani 1 1 d . A .
H21A H -0.4469 0.2757 0.3138 0.122 Uiso 1 1 calc R . .
H21B H -0.483 0.2215 0.3483 0.122 Uiso 1 1 calc R . .
H21C H -0.5409 0.25 0.302 0.122 Uiso 1 1 calc R . .
C51 C 0.0153(3) 0.16769(17) 0.46336(19) 0.0451(9) Uani 1 1 d . E .
C15 C -0.0518(3) 0.1787(2) 0.22701(17) 0.0501(10) Uani 1 1 d . E .
C10 C -0.1365(3) -0.0275(2) 0.2105(2) 0.0577(12) Uani 1 1 d . E .
H10 H -0.1079 -0.0641 0.2048 0.069 Uiso 1 1 calc R . .
C36 C 0.0800(4) 0.0810(2) 0.2670(3) 0.0647(13) Uani 1 1 d . . .
H36A H 0.0491 0.0507 0.2883 0.078 Uiso 1 1 calc R E .
H36B H 0.0723 0.1195 0.2854 0.078 Uiso 1 1 calc R . .
C45 C -0.2739(4) 0.3809(2) 0.2983(2) 0.0595(11) Uani 1 1 d . E .
C2 C -0.4446(3) 0.1969(2) 0.2728(2) 0.0592(12) Uani 1 1 d . . .
C6 C -0.3593(3) 0.0000(2) 0.22239(17) 0.0523(11) Uani 1 1 d . . .
C60 C -0.2412(3) 0.03723(15) 0.35566(15) 0.0376(8) Uani 1 1 d . . .
C16 C -0.1325(3) 0.20652(17) 0.24026(17) 0.0424(9) Uani 1 1 d . . .
C18 C -0.2387(3) 0.27340(17) 0.27105(18) 0.0496(10) Uani 1 1 d . E .
H18 H -0.2295 0.269 0.3105 0.059 Uiso 1 1 calc R . .
O9 O 0.0888(3) 0.3117(2) 0.32858(17) 0.0720(10) Uani 1 1 d . . .
C8 C -0.2744(4) -0.0868(2) 0.2199(2) 0.0616(13) Uani 1 1 d . E .
H8 H -0.2514 -0.1144 0.1921 0.074 Uiso 1 1 calc R . .
C43 C 0.0198(3) 0.31817(19) 0.35132(19) 0.0497(10) Uani 1 1 d . . .
N12 N -0.1150(2) 0.06424(14) 0.38837(14) 0.0396(7) Uani 1 1 d . . .
C41 C -0.0846(3) 0.31132(17) 0.27482(18) 0.0480(10) Uani 1 1 d . . .
H41A H -0.0313 0.3139 0.2533 0.058 Uiso 1 1 calc R E .
H41B H -0.1078 0.3519 0.2783 0.058 Uiso 1 1 calc R . .
C46 C 0.0837(4) 0.3808(2) 0.4208(2) 0.0587(12) Uani 1 1 d . . .
H46A H 0.0641 0.419 0.4359 0.07 Uiso 1 1 calc R . .
H46B H 0.1283 0.3895 0.3937 0.07 Uiso 1 1 calc R . .
O15 O 0.02750(19) 0.09007(14) 0.40065(13) 0.0510(7) Uani 1 1 d . . .
C11 C -0.0855(3) 0.02399(19) 0.2085(2) 0.0509(11) Uani 1 1 d . . .
C3 C -0.4866(3) 0.1340(2) 0.2753(2) 0.0571(12) Uani 1 1 d . A .
H3 H -0.5365 0.1327 0.2501 0.069 Uiso 1 1 calc R . .
O17 O 0.1580(9) 0.0838(8) 0.4802(5) 0.225(8) Uani 1 1 d . E .
H17 H 0.2017 0.0621 0.4782 0.337 Uiso 1 1 calc R . .
C32 C -0.1846(4) -0.1343(3) 0.2951(3) 0.0729(15) Uani 1 1 d . . .
H32A H -0.1544 -0.1569 0.2668 0.087 Uiso 1 1 calc R . .
H32B H -0.1511 -0.0978 0.3023 0.087 Uiso 1 1 calc R . .
C13 C 0.0374(3) 0.0849(2) 0.2120(2) 0.0546(11) Uani 1 1 d . E .
H13 H 0.0759 0.1059 0.1861 0.066 Uiso 1 1 calc R . .
C50 C -0.0741(3) 0.14499(16) 0.45153(17) 0.0407(9) Uani 1 1 d . . .
H50 H -0.1094 0.141 0.4848 0.049 Uiso 1 1 calc R E .
O7 O -0.2506(5) -0.2027(4) 0.3557(3) 0.144(3) Uani 1 1 d . . .
N8 N -0.1200(5) -0.1675(4) 0.3758(4) 0.107(2) Uani 1 1 d . . .
H8A H -0.1174 -0.1886 0.4054 0.128 Uiso 1 1 calc R . .
H8B H -0.0769 -0.1442 0.3669 0.128 Uiso 1 1 calc R . .
C57 C -0.2915(3) -0.02760(19) 0.44553(17) 0.0460(9) Uani 1 1 d . E .
C58 C -0.2120(3) 0.00005(18) 0.44557(16) 0.0459(9) Uani 1 1 d . . .
H58 H -0.1748 -0.0029 0.4756 0.055 Uiso 1 1 calc R E .
C52 C 0.0690(4) 0.1448(2) 0.4160(2) 0.0600(12) Uani 1 1 d . E .
H52 H 0.0665 0.1737 0.3858 0.072 Uiso 1 1 calc R . .
C53 C 0.1586(4) 0.1322(5) 0.4296(5) 0.122(4) Uani 1 1 d . . .
H53A H 0.1884 0.169 0.4405 0.146 Uiso 1 1 calc R E .
H53B H 0.1889 0.1152 0.3984 0.146 Uiso 1 1 calc R . .
C7 C -0.3629(4) -0.0640(2) 0.2032(2) 0.0633(14) Uani 1 1 d . E .
C5 C -0.4267(3) 0.0374(2) 0.23095(18) 0.0532(11) Uani 1 1 d . E .
C34 C -0.0007(4) 0.0335(3) 0.1260(2) 0.0722(16) Uani 1 1 d . . .
H34A H -0.0352 0.0013 0.1109 0.108 Uiso 1 1 calc R E .
H34B H 0.057 0.0326 0.1104 0.108 Uiso 1 1 calc R . .
H34C H -0.028 0.0715 0.1179 0.108 Uiso 1 1 calc R . .
C39 C 0.0282(3) 0.2161(2) 0.2194(2) 0.0568(12) Uani 1 1 d . . .
H39A H 0.0486 0.2299 0.2544 0.085 Uiso 1 1 calc R E .
H39B H 0.0146 0.2502 0.1968 0.085 Uiso 1 1 calc R . .
H39C H 0.0731 0.1923 0.2023 0.085 Uiso 1 1 calc R . .
C49 C -0.0518(3) 0.08460(17) 0.42715(17) 0.0418(9) Uani 1 1 d . E .
H49 H -0.0465 0.0547 0.4565 0.05 Uiso 1 1 calc R . .
C1 C -0.3461(3) 0.18126(18) 0.28252(18) 0.0445(9) Uani 1 1 d . A .
C56 C -0.3466(3) -0.0226(2) 0.40046(18) 0.0477(9) Uani 1 1 d . . .
C35 C 0.0575(4) -0.0289(3) 0.1996(3) 0.0780(18) Uani 1 1 d . . .
H35A H 0.0672 -0.0318 0.2383 0.117 Uiso 1 1 calc R E .
H35B H 0.113 -0.0265 0.1811 0.117 Uiso 1 1 calc R . .
H35C H 0.0262 -0.0639 0.1873 0.117 Uiso 1 1 calc R . .
C33 C -0.1885(6) -0.1706(4) 0.3448(4) 0.095(2) Uani 1 1 d . . .
C12 C 0.0057(4) 0.0257(2) 0.1877(2) 0.0606(13) Uani 1 1 d . E .
C48 C 0.1884(4) 0.3791(2) 0.4972(2) 0.0643(14) Uani 1 1 d . . .
H48A H 0.1629 0.417 0.508 0.096 Uiso 1 1 calc R . .
H48B H 0.2393 0.3866 0.475 0.096 Uiso 1 1 calc R . .
H48C H 0.205 0.3567 0.5291 0.096 Uiso 1 1 calc R . .
C44 C -0.2944(4) 0.3287(2) 0.2620(3) 0.0607(12) Uani 1 1 d . . .
H44A H -0.2876 0.3415 0.2243 0.073 Uiso 1 1 calc R E .
H44B H -0.3555 0.3177 0.2672 0.073 Uiso 1 1 calc R . .
C61 C -0.4332(4) -0.0526(3) 0.4006(2) 0.0649(14) Uani 1 1 d . E .
H61A H -0.4684 -0.0364 0.4297 0.097 Uiso 1 1 calc R . .
H61B H -0.4256 -0.0953 0.4059 0.097 Uiso 1 1 calc R . .
H61C H -0.462 -0.0456 0.3663 0.097 Uiso 1 1 calc R . .
C62 C -0.3206(5) -0.0610(3) 0.4939(2) 0.0728(16) Uani 1 1 d . . .
H62A H -0.3338 -0.1019 0.4839 0.109 Uiso 1 1 calc R E .
H62B H -0.3722 -0.0422 0.5087 0.109 Uiso 1 1 calc R . .
H62C H -0.2749 -0.0607 0.5209 0.109 Uiso 1 1 calc R . .
C54 C -0.1267(3) 0.08811(16) 0.33952(16) 0.0374(8) Uani 1 1 d . E .
C17 C -0.1501(3) 0.27354(18) 0.24396(18) 0.0474(10) Uani 1 1 d . E .
C40 C -0.1544(4) 0.2969(2) 0.1857(2) 0.0633(14) Uani 1 1 d . . .
H40A H -0.2005 0.2765 0.1664 0.095 Uiso 1 1 calc R E .
H40B H -0.0994 0.2896 0.1677 0.095 Uiso 1 1 calc R . .
H40C H -0.1661 0.3396 0.1861 0.095 Uiso 1 1 calc R . .
C25 C -0.6057(4) 0.1204(4) 0.3463(3) 0.0857(19) Uani 1 1 d . A .
H25A H -0.6134 0.1635 0.3519 0.103 Uiso 1 1 calc R . .
H25B H -0.6453 0.1078 0.3174 0.103 Uiso 1 1 calc R . .
C24 C -0.5142(4) 0.1080(3) 0.3298(3) 0.0679(14) Uani 1 1 d . . .
H24A H -0.5059 0.0646 0.3287 0.081 Uiso 1 1 calc R A .
H24B H -0.4755 0.1239 0.3578 0.081 Uiso 1 1 calc R . .
C26 C -0.6274(4) 0.0882(3) 0.3967(3) 0.0747(16) Uani 1 1 d . . .
N6 N -0.6129(5) 0.1148(3) 0.4406(3) 0.0877(17) Uani 1 1 d . A .
H6A H -0.6243 0.0972 0.4712 0.105 Uiso 1 1 calc R . .
H6B H -0.5915 0.1508 0.4404 0.105 Uiso 1 1 calc R . .
O5 O -0.6580(4) 0.0366(3) 0.3966(3) 0.1117(19) Uani 1 1 d . A .
C20 C -0.3214(3) 0.18104(18) 0.34197(17) 0.0423(9) Uani 1 1 d . . .
H20A H -0.3546 0.1506 0.3608 0.064 Uiso 1 1 calc R A .
H20B H -0.3338 0.2199 0.3576 0.064 Uiso 1 1 calc R . .
H20C H -0.2599 0.1725 0.3455 0.064 Uiso 1 1 calc R . .
C100 C 0.2328(6) 0.0912(6) 0.2286(6) 0.123(3) Uani 1 1 d . . .
N N 0.2498(5) 0.1425(5) 0.2273(5) 0.139(4) Uani 1 1 d . E .
H0A H 0.2812 0.1568 0.2009 0.167 Uiso 1 1 calc R . .
H0B H 0.2311 0.1662 0.2527 0.167 Uiso 1 1 calc R . .
O O 0.2597(5) 0.0591(4) 0.1926(5) 0.146(3) Uani 1 1 d . E .
O1AC O 0.0180(7) 0.9209(5) 0.3420(5) 0.155(3) Uani 1 1 d . . .
C1AC C 0.0341(14) 0.9386(6) 0.4317(8) 0.159(5) Uani 1 1 d . . .
H1A1 H -0.0289 0.9389 0.4312 0.238 Uiso 1 1 calc R . .
H1A2 H 0.0552 0.9743 0.4497 0.238 Uiso 1 1 calc R . .
H1A3 H 0.0543 0.9034 0.451 0.238 Uiso 1 1 calc R . .
C2AC C 0.0664(9) 0.9371(4) 0.3768(5) 0.115(3) Uani 1 1 d . . .
C3AC C 0.1506(8) 0.9534(5) 0.3644(7) 0.137(4) Uani 1 1 d . . .
H3A1 H 0.1637 0.9418 0.3275 0.206 Uiso 1 1 calc R . .
H3A2 H 0.1903 0.9336 0.389 0.206 Uiso 1 1 calc R . .
H3A3 H 0.1567 0.9964 0.3681 0.206 Uiso 1 1 calc R . .
C4AC C 0.9704(13) 0.9210(8) 0.5484(7) 0.099(4) Uiso 0.5 1 d P . .
C5AC C 0.9105(19) 0.8795(12) 0.5214(12) 0.134(7) Uiso 0.5 1 d P . .
H5A1 H 0.8737 0.9016 0.4966 0.201 Uiso 0.5 1 calc PR . .
H5A2 H 0.8747 0.8597 0.5483 0.201 Uiso 0.5 1 calc PR . .
H5A3 H 0.9435 0.8498 0.5015 0.201 Uiso 0.5 1 calc PR . .
C6AC C 1.0315(13) 0.8955(9) 0.5850(8) 0.102(5) Uiso 0.5 1 d P . .
H6A1 H 1.0698 0.9265 0.5984 0.154 Uiso 0.5 1 calc PR . .
H6A2 H 1.0654 0.8653 0.5664 0.154 Uiso 0.5 1 calc PR . .
H6A3 H 1.0008 0.8773 0.6151 0.154 Uiso 0.5 1 calc PR . .
O7AC O 0.9737(13) 0.9760(9) 0.5374(8) 0.144(5) Uiso 0.5 1 d P . .
O1W O 0.7936(4) 0.26577(17) 0.46534(17) 0.0809(13) Uani 1 1 d . . .
O2W O 0.6214(4) 0.3266(3) 0.1136(3) 0.127(3) Uani 1 1 d . . .
O3W O 0.2106(7) 0.2345(7) 0.3327(3) 0.195(6) Uani 1 1 d . . .
O4W O 0.8494(4) 0.3783(4) 0.4407(3) 0.0962(19) Uani 0.8 1 d P B 1
O4WA O 0.8420(10) 0.4248(7) 0.4400(6) 0.042(3) Uiso 0.2 1 d P C 2
O5W O -0.6352(6) -0.0547(3) 0.3241(3) 0.114(2) Uani 0.85 1 d P . .
O7W O 0.3037(5) 0.2456(3) 0.4237(3) 0.0656(18) Uiso 0.5 1 d P . .
O8W O 0.2630(15) 0.9871(9) 0.4864(8) 0.090(5) Uiso 0.25 1 d P . .
O9W O 0.7083(4) 0.3582(3) 0.4393(3) 0.0351(13) Uiso 0.4 1 d P D 1
O9WA O -0.3765(5) 0.3722(3) 0.4147(3) 0.0774(19) Uani 0.6 1 d P . 2
O10W O 1.1024(11) 1.0589(7) 0.5863(7) 0.081(4) Uiso 0.3 1 d P . .
O11W O 0.2008(11) 0.1685(7) 0.2916(6) 0.049(3) Uiso 0.2 1 d P . .
O12W O -0.715(4) 0.189(3) 0.095(2) 0.191(16) Uiso 0.25 1 d P . .
C99 C -0.2521(5) 0.1120(3) 0.1624(3) 0.087(2) Uani 0.93 1 d P E 1
F1 F -0.2059(3) 0.15490(18) 0.14061(13) 0.0804(11) Uani 0.93 1 d P E 1
F2 F -0.2265(3) 0.06231(18) 0.13115(12) 0.0831(12) Uani 0.93 1 d P E 1
F3 F -0.3314(3) 0.1188(2) 0.14799(14) 0.0916(13) Uani 0.93 1 d P E 1
I I -0.2581 0.1121 0.1443 0.079 Uani 0.07 1 d P E 2
O6WA O 0.2044(17) 0.0884(12) 0.0842(10) 0.124(7) Uiso 0.3 1 d P F 1
O6WB O 0.2595(4) 0.0302(2) 0.1270(3) 0.0762(16) Uani 0.7 1 d P E 2
 
loop_
    _atom_site_aniso_label
    _atom_site_aniso_U_11
    _atom_site_aniso_U_22
    _atom_site_aniso_U_33
    _atom_site_aniso_U_23
    _atom_site_aniso_U_13
    _atom_site_aniso_U_12
C37 0.051(3) 0.066(3) 0.135(6) -0.025(4) -0.001(4) 0.001(2)
C29 0.111(5) 0.093(4) 0.053(3) -0.018(3) 0.003(3) -0.061(4)
C30 0.104(6) 0.106(5) 0.046(3) -0.025(3) 0.015(3) -0.052(5)
N7 0.134(5) 0.063(3) 0.073(3) 0.003(2) -0.041(3) -0.040(3)
O6 0.081(5) 0.252(11) 0.239(10) -0.203(10) 0.020(5) -0.023(5)
C22A 0.022(4) 0.096(6) 0.036(4) 0.001(4) -0.001(3) 0.017(4)
C23A 0.028(5) 0.135(10) 0.046(5) 0.023(6) 0.005(3) 0.009(5)
O5A 0.045(5) 0.151(9) 0.132(8) 0.042(6) -0.028(4) 0.007(5)
N4A 0.064(7) 0.089(7) 0.080(6) -0.021(5) -0.037(5) 0.063(6)
Co1 0.0410(3) 0.0430(3) 0.0361(2) -0.0057(2) -0.0051(2) -0.0104(2)
P1 0.0734(9) 0.0401(6) 0.0649(7) -0.0023(5) -0.0105(6) -0.0073(5)
O16 0.0436(17) 0.0395(14) 0.0551(17) 0.0034(12) -0.0210(13) -0.0016(12)
O10 0.105(4) 0.114(3) 0.058(2) -0.014(2) -0.014(2) 0.022(3)
O11 0.056(2) 0.0359(14) 0.069(2) 0.0027(13) -0.0275(15) -0.0101(13)
O12 0.0518(19) 0.0396(14) 0.069(2) -0.0036(14) -0.0054(15) -0.0051(13)
N13 0.0308(17) 0.0360(14) 0.0458(17) -0.0031(12) 0.0000(13) -0.0043(12)
C4 0.041(2) 0.066(3) 0.041(2) 0.0012(19) -0.0115(16) -0.0076(19)
C14 0.041(2) 0.051(2) 0.050(2) -0.0087(18) 0.0070(18) -0.0102(18)
N1 0.0430(19) 0.0475(17) 0.0352(15) -0.0007(14) -0.0118(14) -0.0021(14)
N11 0.052(3) 0.055(2) 0.108(4) -0.014(2) -0.008(2) 0.0125(18)
N10 0.058(3) 0.0458(19) 0.060(2) 0.0023(17) -0.0195(19) -0.0155(17)
N2 0.051(2) 0.0519(18) 0.0410(18) -0.0094(14) -0.0010(16) -0.0139(16)
N4 0.047(2) 0.0366(15) 0.0388(17) -0.0023(12) -0.0114(13) -0.0075(13)
C31 0.054(3) 0.054(2) 0.068(3) -0.015(2) 0.009(2) -0.016(2)
C27 0.058(3) 0.080(3) 0.077(3) 0.000(3) -0.023(3) -0.027(3)
C42 0.060(3) 0.047(2) 0.050(2) 0.0062(18) -0.016(2) -0.0113(19)
N3 0.049(2) 0.0487(19) 0.0456(18) -0.0059(14) 0.0023(15) -0.0133(15)
C59 0.043(2) 0.0313(16) 0.044(2) -0.0041(14) -0.0031(16) -0.0026(15)
C55 0.033(2) 0.048(2) 0.043(2) -0.0038(16) -0.0049(15) -0.0042(15)
C28 0.076(4) 0.071(3) 0.059(3) -0.009(2) -0.001(2) -0.045(3)
O13 0.101(3) 0.0536(19) 0.097(3) 0.000(2) -0.054(3) -0.009(2)
C9 0.063(3) 0.048(2) 0.056(2) -0.0172(18) 0.010(2) -0.022(2)
O14 0.191(7) 0.055(2) 0.149(5) 0.011(3) 0.104(5) -0.010(3)
C19 0.043(2) 0.049(2) 0.045(2) 0.0041(15) -0.0162(17) 0.0006(17)
C47 0.048(3) 0.040(2) 0.061(3) -0.0079(18) -0.012(2) -0.0116(17)
C21 0.045(3) 0.063(3) 0.137(6) 0.002(3) -0.001(3) 0.021(2)
C51 0.042(2) 0.0346(18) 0.058(2) -0.0006(16) -0.0177(18) -0.0063(16)
C15 0.057(3) 0.049(2) 0.044(2) -0.0031(17) -0.0059(18) -0.0119(19)
C10 0.059(3) 0.043(2) 0.072(3) -0.021(2) 0.021(2) -0.014(2)
C36 0.051(3) 0.054(3) 0.089(4) -0.013(2) 0.009(3) -0.002(2)
C45 0.045(3) 0.063(3) 0.071(3) 0.000(2) -0.004(2) 0.013(2)
C2 0.037(3) 0.059(3) 0.081(3) 0.013(2) -0.021(2) 0.0013(19)
C6 0.061(3) 0.056(2) 0.040(2) -0.0095(18) -0.0058(19) -0.027(2)
C60 0.038(2) 0.0337(16) 0.0416(18) -0.0044(14) -0.0024(15) -0.0018(14)
C16 0.051(2) 0.0400(18) 0.0360(17) 0.0023(16) -0.0099(18) -0.0125(16)
C18 0.058(3) 0.0393(19) 0.051(2) 0.0052(16) -0.018(2) -0.0009(18)
O9 0.064(3) 0.087(3) 0.065(2) -0.0011(19) -0.0105(19) -0.020(2)
C8 0.065(3) 0.054(2) 0.066(3) -0.025(2) 0.012(2) -0.023(2)
C43 0.055(3) 0.040(2) 0.055(2) 0.0067(18) -0.014(2) -0.0083(18)
N12 0.0347(18) 0.0351(15) 0.0490(18) 0.0001(13) -0.0091(14) -0.0052(12)
C41 0.060(3) 0.0323(18) 0.052(2) 0.0067(16) -0.0153(19) -0.0072(17)
C46 0.061(3) 0.044(2) 0.071(3) 0.001(2) -0.022(2) -0.018(2)
O15 0.0319(16) 0.0532(16) 0.0679(19) -0.0136(15) -0.0083(13) -0.0048(12)
C11 0.058(3) 0.039(2) 0.056(3) -0.0126(18) 0.012(2) -0.0075(18)
C3 0.037(3) 0.061(3) 0.073(3) 0.008(2) -0.018(2) -0.0050(19)
O17 0.176(10) 0.321(17) 0.178(9) -0.093(11) -0.095(8) 0.154(12)
C32 0.059(4) 0.068(3) 0.091(4) -0.009(3) -0.001(3) -0.019(3)
C13 0.046(3) 0.046(2) 0.071(3) -0.012(2) 0.015(2) -0.0092(18)
C50 0.042(2) 0.0318(17) 0.048(2) 0.0015(15) -0.0150(17) -0.0016(15)
O7 0.100(5) 0.176(6) 0.157(6) 0.075(5) -0.051(4) -0.079(5)
N8 0.077(4) 0.115(5) 0.128(5) -0.002(4) -0.019(4) -0.028(4)
C57 0.045(3) 0.047(2) 0.045(2) -0.0020(17) 0.0012(17) -0.0067(17)
C58 0.054(3) 0.044(2) 0.040(2) -0.0005(16) -0.0069(17) -0.0052(17)
C52 0.046(3) 0.061(3) 0.073(3) -0.013(2) -0.002(2) -0.013(2)
C53 0.025(3) 0.143(7) 0.196(11) -0.101(8) 0.000(4) -0.015(3)
C7 0.075(4) 0.064(3) 0.052(3) -0.014(2) 0.005(2) -0.036(3)
C5 0.050(3) 0.068(3) 0.042(2) -0.003(2) -0.0115(19) -0.018(2)
C34 0.080(4) 0.073(3) 0.063(3) -0.022(3) 0.026(3) -0.026(3)
C39 0.054(3) 0.049(2) 0.068(3) -0.006(2) 0.006(2) -0.015(2)
C49 0.035(2) 0.0398(19) 0.051(2) 0.0008(16) -0.0149(16) -0.0048(15)
C1 0.043(2) 0.0390(19) 0.051(2) -0.0039(16) -0.0159(18) 0.0084(16)
C56 0.039(2) 0.055(2) 0.049(2) -0.0049(18) 0.0058(17) -0.0088(18)
C35 0.062(4) 0.054(3) 0.117(5) -0.028(3) 0.023(3) -0.011(2)
C33 0.075(5) 0.090(4) 0.119(6) 0.008(4) -0.031(4) -0.023(4)
C12 0.058(3) 0.050(2) 0.074(3) -0.016(2) 0.018(2) -0.017(2)
C48 0.063(3) 0.054(2) 0.076(3) -0.006(2) -0.029(3) -0.016(2)
C44 0.058(3) 0.047(2) 0.077(3) 0.013(2) -0.022(2) 0.0043(19)
C61 0.047(3) 0.094(4) 0.055(3) 0.007(3) 0.002(2) -0.028(3)
C62 0.080(4) 0.083(4) 0.056(3) 0.019(3) -0.004(3) -0.025(3)
C54 0.032(2) 0.0342(17) 0.046(2) -0.0032(15) -0.0064(15) -0.0032(14)
C17 0.055(3) 0.0388(19) 0.049(2) 0.0046(17) -0.0153(19) -0.0057(17)
C40 0.082(4) 0.056(3) 0.052(3) 0.016(2) -0.024(2) -0.018(2)
C25 0.044(3) 0.106(5) 0.107(5) 0.000(4) -0.015(3) -0.001(3)
C24 0.052(3) 0.077(3) 0.075(3) 0.000(3) -0.010(2) 0.002(2)
C26 0.051(3) 0.078(4) 0.095(4) -0.013(3) 0.005(3) -0.015(3)
N6 0.092(4) 0.088(4) 0.083(4) -0.005(3) -0.003(3) -0.035(3)
O5 0.101(4) 0.086(3) 0.148(5) -0.030(3) 0.024(4) -0.028(3)
C20 0.044(2) 0.0383(18) 0.045(2) -0.0056(15) -0.0080(17) 0.0025(16)
C100 0.067(5) 0.115(7) 0.188(10) -0.008(8) 0.007(6) -0.005(5)
N 0.081(5) 0.121(6) 0.215(10) 0.061(6) -0.046(5) -0.022(4)
O 0.102(5) 0.114(5) 0.222(9) 0.008(5) 0.052(6) 0.014(4)
O1AC 0.127(7) 0.164(8) 0.175(8) -0.026(6) -0.002(6) -0.027(6)
C1AC 0.198(15) 0.106(7) 0.173(13) 0.006(8) -0.018(11) 0.017(8)
C2AC 0.135(9) 0.070(4) 0.139(8) -0.031(5) 0.020(7) 0.004(5)
C3AC 0.096(7) 0.087(5) 0.228(14) 0.001(7) -0.009(8) -0.010(5)
O1W 0.123(4) 0.0540(19) 0.066(2) -0.0078(16) -0.015(2) 0.018(2)
O2W 0.097(4) 0.132(5) 0.152(6) 0.083(5) -0.047(4) 0.002(3)
O3W 0.147(8) 0.328(15) 0.108(5) 0.056(7) 0.002(5) 0.131(9)
O4W 0.077(4) 0.114(5) 0.097(4) -0.023(4) -0.013(3) 0.000(3)
O5W 0.129(6) 0.105(4) 0.106(5) -0.042(4) -0.022(4) -0.023(4)
O9WA 0.071(4) 0.070(4) 0.092(5) 0.021(3) 0.017(4) 0.004(3)
C99 0.092(6) 0.090(4) 0.078(4) -0.032(3) 0.012(4) -0.052(4)
F1 0.106(3) 0.090(2) 0.0455(16) 0.0046(15) -0.0069(17) -0.038(2)
F2 0.115(3) 0.094(2) 0.0398(14) -0.0215(15) 0.0103(18) -0.043(2)
F3 0.084(3) 0.141(4) 0.0492(18) 0.008(2) -0.0249(18) -0.026(2)
I 0.072 0.083 0.082 -0.033 0.014 -0.028
O6WB 0.064(4) 0.060(3) 0.105(4) 0.011(3) 0.019(3) -0.001(2)
 
 
#----------------------------------------------------------------------------#
#                   MOLECULAR GEOMETRY                                       #
#----------------------------------------------------------------------------#
 
_geom_special_details
;
 All s.u.'s (except the s.u. in the dihedral angle between two l.s. planes)
 are estimated using the full covariance matrix.  The cell s.u.'s are taken
 into account individually in the estimation of s.u.'s in distances, angles
 and torsion angles; correlations between s.u.'s in cell parameters are only
 used when they are defined by crystal symmetry.  An approximate (isotropic)
 treatment of cell s.u.'s is used for estimating s.u.'s involving l.s. planes.
;
loop_
    _geom_bond_atom_site_label_1
    _geom_bond_atom_site_label_2
    _geom_bond_distance
    _geom_bond_site_symmetry_2
    _geom_bond_publ_flag
C37 C100 1.434(16) . ?
C37 C36 1.537(9) . ?
C29 C30 1.523(10) . ?
C29 C7 1.563(8) . ?
C30 O6 1.232(13) . ?
C30 N7 1.274(10) . ?
C22A C23A 1.515(12) . ?
C22A C2 1.647(10) . ?
C23A O5A 1.259(13) . ?
C23A N4A 1.294(13) . ?
C22B C2 1.410(16) . ?
C22B C23B 1.56(3) . ?
C23B O4B 1.06(2) . ?
C23B N5B 1.24(4) . ?
Co1 N1 1.868(4) . ?
Co1 N3 1.892(4) . ?
Co1 N4 1.897(3) . ?
Co1 N2 1.922(3) . ?
Co1 C99 1.956(8) . ?
Co1 N13 2.099(3) . ?
Co1 I 2.4112(5) . ?
P1 O13 1.436(5) . ?
P1 O14 1.485(6) . ?
P1 O12 1.583(3) . ?
P1 O11 1.586(4) . ?
O16 C50 1.410(5) . ?
O10 C45 1.248(7) . ?
O11 C51 1.425(5) . ?
O12 C47 1.451(6) . ?
N13 C54 1.314(5) . ?
N13 C60 1.402(5) . ?
C4 N1 1.297(6) . ?
C4 C5 1.448(7) . ?
C4 C3 1.519(8) . ?
C14 C15 1.376(7) . ?
C14 N3 1.392(6) . ?
C14 C13 1.526(7) . ?
N1 C1 1.498(5) . ?
N11 C45 1.293(7) . ?
N10 C43 1.331(7) . ?
N10 C46 1.454(6) . ?
N2 C9 1.330(7) . ?
N2 C6 1.388(7) . ?
N4 C16 1.291(5) . ?
N4 C19 1.480(6) . ?
C31 C32 1.528(9) . ?
C31 C8 1.541(8) . ?
C27 C5 1.524(7) . ?
C42 C43 1.513(7) . ?
C42 C41 1.535(6) . ?
N3 C11 1.342(6) . ?
C59 N12 1.377(5) . ?
C59 C60 1.392(6) . ?
C59 C58 1.398(6) . ?
C55 C56 1.392(6) . ?
C55 C60 1.392(6) . ?
C28 C7 1.537(7) . ?
C9 C10 1.373(8) . ?
C9 C8 1.508(6) . ?
C19 C18 1.518(6) . ?
C19 C1 1.547(7) . ?
C47 C48 1.510(6) . ?
C47 C46 1.518(7) . ?
C21 C2 1.506(10) . ?
C51 C50 1.512(6) . ?
C51 C52 1.537(8) . ?
C15 C16 1.443(7) . ?
C15 C39 1.516(7) . ?
C10 C11 1.409(6) . ?
C36 C13 1.529(9) . ?
C45 C44 1.523(8) . ?
C2 C3 1.565(7) . ?
C2 C1 1.592(6) . ?
C6 C5 1.363(8) . ?
C6 C7 1.525(7) . ?
C16 C17 1.541(6) . ?
C18 C17 1.535(7) . ?
C18 C44 1.537(6) . ?
O9 C43 1.224(7) . ?
C8 C7 1.528(10) . ?
N12 C54 1.346(5) . ?
N12 C49 1.454(5) . ?
C41 C17 1.537(6) . ?
O15 C49 1.406(6) . ?
O15 C52 1.447(6) . ?
C11 C12 1.511(7) . ?
C3 C24 1.543(9) . ?
O17 C53 1.67(2) . ?
C32 C33 1.488(12) . ?
C13 C12 1.550(6) . ?
C50 C49 1.534(6) . ?
O7 C33 1.240(10) . ?
N8 C33 1.319(11) . ?
C57 C58 1.386(7) . ?
C57 C56 1.419(7) . ?
C57 C62 1.495(7) . ?
C52 C53 1.462(10) . ?
C34 C12 1.553(9) . ?
C1 C20 1.534(6) . ?
C56 C61 1.509(7) . ?
C35 C12 1.503(10) . ?
C17 C40 1.550(7) . ?
C25 C26 1.492(11) . ?
C25 C24 1.508(10) . ?
C26 O5 1.260(9) . ?
C26 N6 1.270(9) . ?
C100 N 1.190(14) . ?
C100 O 1.227(15) . ?
O O6WB 1.764(15) . ?
O1AC C2AC 1.207(15) . ?
C1AC C2AC 1.46(2) . ?
C2AC C3AC 1.394(18) . ?
C4AC O7AC 1.27(3) . ?
C4AC C6AC 1.44(3) . ?
C4AC C5AC 1.48(3) . ?
O3W O11W 1.81(2) . ?
O9WA O10W 1.590(18) 3_366 ?
O10W O9WA 1.590(18) 3_666 ?
C99 F3 1.296(10) . ?
C99 F1 1.324(8) . ?
C99 F2 1.424(9) . ?
 
loop_
    _geom_angle_atom_site_label_1
    _geom_angle_atom_site_label_2
    _geom_angle_atom_site_label_3
    _geom_angle
    _geom_angle_site_symmetry_1
    _geom_angle_site_symmetry_3
    _geom_angle_publ_flag
C100 C37 C36 120.0(8) . . ?
C30 C29 C7 110.5(6) . . ?
O6 C30 N7 120.8(7) . . ?
O6 C30 C29 120.8(6) . . ?
N7 C30 C29 118.4(9) . . ?
C23A C22A C2 112.6(7) . . ?
O5A C23A N4A 117.8(10) . . ?
O5A C23A C22A 121.8(10) . . ?
N4A C23A C22A 118.8(10) . . ?
C2 C22B C23B 123.5(15) . . ?
O4B C23B N5B 122(3) . . ?
O4B C23B C22B 123.1(16) . . ?
N5B C23B C22B 112(3) . . ?
N1 Co1 N3 173.22(15) . . ?
N1 Co1 N4 83.29(15) . . ?
N3 Co1 N4 90.28(16) . . ?
N1 Co1 N2 89.68(16) . . ?
N3 Co1 N2 96.83(17) . . ?
N4 Co1 N2 172.49(17) . . ?
N1 Co1 C99 93.0(3) . . ?
N3 Co1 C99 88.9(3) . . ?
N4 Co1 C99 87.9(2) . . ?
N2 Co1 C99 89.8(2) . . ?
N1 Co1 N13 91.05(14) . . ?
N3 Co1 N13 87.31(15) . . ?
N4 Co1 N13 94.55(13) . . ?
N2 Co1 N13 88.20(13) . . ?
C99 Co1 N13 175.5(3) . . ?
N1 Co1 I 93.39(10) . . ?
N3 Co1 I 88.73(12) . . ?
N4 Co1 I 89.98(10) . . ?
N2 Co1 I 87.79(10) . . ?
C99 Co1 I 2.1(2) . . ?
N13 Co1 I 174.00(9) . . ?
O13 P1 O14 112.6(4) . . ?
O13 P1 O12 114.3(2) . . ?
O14 P1 O12 106.6(2) . . ?
O13 P1 O11 111.3(2) . . ?
O14 P1 O11 110.9(4) . . ?
O12 P1 O11 100.52(18) . . ?
C51 O11 P1 119.6(3) . . ?
C47 O12 P1 121.2(3) . . ?
C54 N13 C60 105.2(3) . . ?
C54 N13 Co1 121.8(3) . . ?
C60 N13 Co1 132.8(3) . . ?
N1 C4 C5 123.5(4) . . ?
N1 C4 C3 112.4(4) . . ?
C5 C4 C3 124.0(4) . . ?
C15 C14 N3 126.7(4) . . ?
C15 C14 C13 123.7(4) . . ?
N3 C14 C13 109.2(4) . . ?
C4 N1 C1 112.0(4) . . ?
C4 N1 Co1 131.0(3) . . ?
C1 N1 Co1 116.7(3) . . ?
C43 N10 C46 123.2(5) . . ?
C9 N2 C6 109.7(4) . . ?
C9 N2 Co1 122.9(3) . . ?
C6 N2 Co1 126.9(3) . . ?
C16 N4 C19 111.0(3) . . ?
C16 N4 Co1 133.4(3) . . ?
C19 N4 Co1 114.2(3) . . ?
C32 C31 C8 114.1(5) . . ?
C43 C42 C41 111.0(4) . . ?
C11 N3 C14 109.5(4) . . ?
C11 N3 Co1 124.0(3) . . ?
C14 N3 Co1 126.5(3) . . ?
N12 C59 C60 106.1(3) . . ?
N12 C59 C58 131.9(4) . . ?
C60 C59 C58 122.0(4) . . ?
C56 C55 C60 119.2(4) . . ?
N2 C9 C10 125.2(4) . . ?
N2 C9 C8 111.1(5) . . ?
C10 C9 C8 123.6(5) . . ?
N4 C19 C18 102.7(3) . . ?
N4 C19 C1 105.6(3) . . ?
C18 C19 C1 122.3(4) . . ?
O12 C47 C48 107.2(4) . . ?
O12 C47 C46 107.0(4) . . ?
C48 C47 C46 111.7(4) . . ?
O11 C51 C50 113.0(3) . . ?
O11 C51 C52 110.1(4) . . ?
C50 C51 C52 103.7(3) . . ?
C14 C15 C16 120.9(4) . . ?
C14 C15 C39 119.1(4) . . ?
C16 C15 C39 120.0(4) . . ?
C9 C10 C11 126.6(5) . . ?
C13 C36 C37 116.3(6) . . ?
O10 C45 N11 123.9(5) . . ?
O10 C45 C44 120.2(5) . . ?
N11 C45 C44 115.8(5) . . ?
C22B C2 C21 96.4(8) . . ?
C22B C2 C3 112.7(7) . . ?
C21 C2 C3 113.3(5) . . ?
C22B C2 C1 119.5(9) . . ?
C21 C2 C1 114.5(4) . . ?
C3 C2 C1 101.2(4) . . ?
C22B C2 C22A 19.7(6) . . ?
C21 C2 C22A 115.7(6) . . ?
C3 C2 C22A 105.6(5) . . ?
C1 C2 C22A 105.0(5) . . ?
C5 C6 N2 123.6(4) . . ?
C5 C6 C7 127.5(4) . . ?
N2 C6 C7 108.9(5) . . ?
C59 C60 C55 119.8(4) . . ?
C59 C60 N13 108.5(3) . . ?
C55 C60 N13 131.7(4) . . ?
N4 C16 C15 122.1(4) . . ?
N4 C16 C17 111.0(4) . . ?
C15 C16 C17 126.7(4) . . ?
C19 C18 C17 102.2(4) . . ?
C19 C18 C44 114.6(4) . . ?
C17 C18 C44 116.1(4) . . ?
C9 C8 C7 100.8(4) . . ?
C9 C8 C31 112.1(4) . . ?
C7 C8 C31 113.5(4) . . ?
O9 C43 N10 122.1(4) . . ?
O9 C43 C42 121.4(4) . . ?
N10 C43 C42 116.5(5) . . ?
C54 N12 C59 107.0(3) . . ?
C54 N12 C49 124.6(3) . . ?
C59 N12 C49 125.4(3) . . ?
C42 C41 C17 115.5(3) . . ?
N10 C46 C47 113.3(4) . . ?
C49 O15 C52 110.0(3) . . ?
N3 C11 C10 123.8(4) . . ?
N3 C11 C12 111.8(4) . . ?
C10 C11 C12 124.2(4) . . ?
C4 C3 C24 108.4(4) . . ?
C4 C3 C2 101.0(4) . . ?
C24 C3 C2 119.8(5) . . ?
C33 C32 C31 111.9(5) . . ?
C14 C13 C36 107.9(4) . . ?
C14 C13 C12 101.4(4) . . ?
C36 C13 C12 116.1(4) . . ?
O16 C50 C51 111.8(3) . . ?
O16 C50 C49 108.7(3) . . ?
C51 C50 C49 99.9(3) . . ?
C58 C57 C56 120.3(4) . . ?
C58 C57 C62 119.8(4) . . ?
C56 C57 C62 119.9(4) . . ?
C57 C58 C59 118.3(4) . . ?
O15 C52 C53 108.7(5) . . ?
O15 C52 C51 104.4(4) . . ?
C53 C52 C51 113.9(6) . . ?
C52 C53 O17 107.4(8) . . ?
C6 C7 C8 101.6(4) . . ?
C6 C7 C28 116.4(5) . . ?
C8 C7 C28 112.3(5) . . ?
C6 C7 C29 105.2(5) . . ?
C8 C7 C29 110.7(5) . . ?
C28 C7 C29 110.1(4) . . ?
C6 C5 C4 121.7(4) . . ?
C6 C5 C27 122.7(5) . . ?
C4 C5 C27 115.6(5) . . ?
O15 C49 N12 107.9(3) . . ?
O15 C49 C50 107.9(3) . . ?
N12 C49 C50 113.1(3) . . ?
N1 C1 C20 111.2(3) . . ?
N1 C1 C19 102.5(3) . . ?
C20 C1 C19 109.3(3) . . ?
N1 C1 C2 102.1(3) . . ?
C20 C1 C2 113.0(4) . . ?
C19 C1 C2 118.0(4) . . ?
C55 C56 C57 120.5(4) . . ?
C55 C56 C61 119.4(4) . . ?
C57 C56 C61 120.1(4) . . ?
O7 C33 N8 122.1(8) . . ?
O7 C33 C32 122.6(7) . . ?
N8 C33 C32 115.3(7) . . ?
C35 C12 C11 114.5(4) . . ?
C35 C12 C13 117.4(5) . . ?
C11 C12 C13 100.7(4) . . ?
C35 C12 C34 108.9(5) . . ?
C11 C12 C34 106.5(5) . . ?
C13 C12 C34 108.1(4) . . ?
C45 C44 C18 115.0(4) . . ?
N13 C54 N12 113.1(3) . . ?
C18 C17 C41 112.1(4) . . ?
C18 C17 C16 100.6(3) . . ?
C41 C17 C16 117.2(4) . . ?
C18 C17 C40 112.0(4) . . ?
C41 C17 C40 108.1(3) . . ?
C16 C17 C40 106.6(4) . . ?
C26 C25 C24 110.7(6) . . ?
C25 C24 C3 115.7(5) . . ?
O5 C26 N6 120.4(7) . . ?
O5 C26 C25 122.3(7) . . ?
N6 C26 C25 117.2(6) . . ?
N C100 O 118.6(13) . . ?
N C100 C37 123.2(13) . . ?
O C100 C37 118.0(10) . . ?
C100 O O6WB 153.9(9) . . ?
O1AC C2AC C3AC 120.5(13) . . ?
O1AC C2AC C1AC 117.9(14) . . ?
C3AC C2AC C1AC 121.7(15) . . ?
O7AC C4AC C6AC 120.0(18) . . ?
O7AC C4AC C5AC 122.9(19) . . ?
C6AC C4AC C5AC 116.8(18) . . ?
F3 C99 F1 108.3(8) . . ?
F3 C99 F2 102.0(5) . . ?
F1 C99 F2 101.5(5) . . ?
F3 C99 Co1 117.2(5) . . ?
F1 C99 Co1 116.4(4) . . ?
F2 C99 Co1 109.2(6) . . ?
 
# The following lines are used to test the character set of files sent by
# network email or other means. They are not part of the CIF data set
# abcdefghijklmnopqrstuvwxyzABCDEFGHIJKLMNOPQRSTUVWXYZ0123456789
# !@#$%^&*()_+{}:"~<>?|\-=[];'`,./
 
# END of CIF
